# Supplementary material
Source: PubMed Central journal article supplement (PMC4096229)
Supplement: mp500085p_si_001.pdf [file mp500085p_si_001.pdf]

## Supporting Information

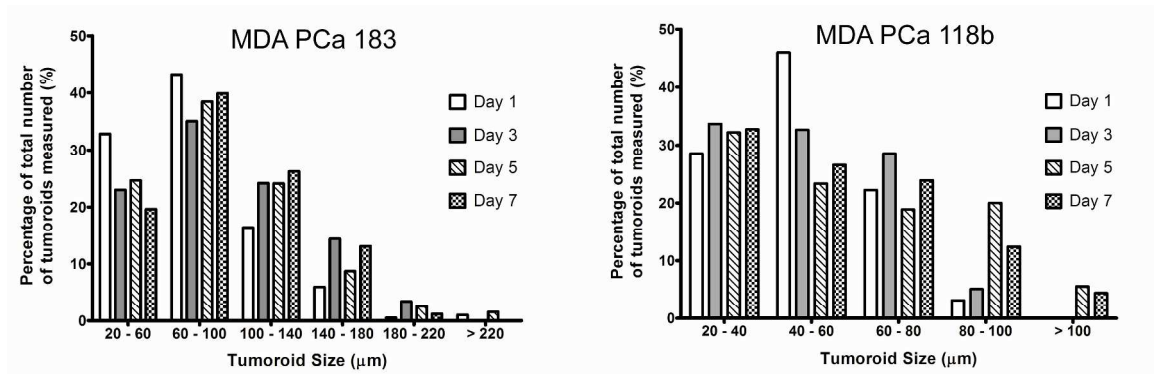

**Supplementary Figure 1.** Average tumoroid size of hydrogel-encapsulated MDA PCa 183 and 118b cells over time. The longest axis through each tumoroid was measured.

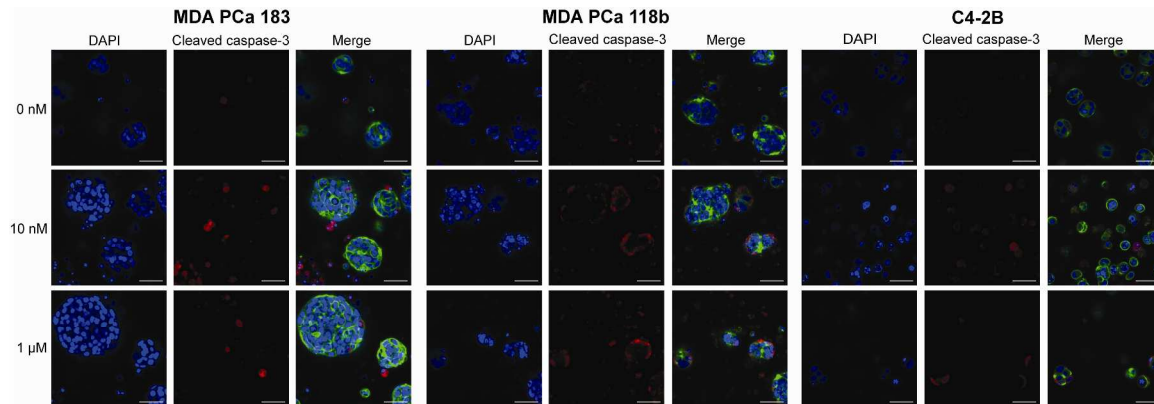

**Supplementary Figure 2.** Cleaved caspase-3 expression of docetaxel-treated cells. Cells were probed for cleaved caspase-3 expression at increasing docetaxel concentrations where cells were stained with DAPI (blue, left panels) and with antibodies against cleaved caspase-3 (red, middle panels). Right panels show merged images where green indicates F-actin. Scale bars = 50 μm.
